# Supplementary material for: Aramid and zirconia coated separator for enhanced electrochemical performance of lithium-ion batteries
Source: Royal Society of Chemistry journal article supplement (doi:10.1039/d5ra03903g), 2025-01-01
Supplement: d5ra03903g3.pdf [file d5ra03903g3.pdf]

## **Aramid and Zirconia Coated Separator for Enhanced Electrochemical Performance of Lithium-ion Batteries**

Daofa Ying<sup>a\*</sup>, Kuo Chen<sup>a</sup>, Jiazheng Lu<sup>a</sup>, Chuanpina Wu<sup>a</sup>, Baohui Chen<sup>a</sup>

Yang Lv<sup>a</sup>, Yutao Liu<sup>a</sup>, Zhen Fang<sup>a</sup>

<sup>a</sup> State Key Laboratory of Disaster Prevention and Reduction for Power Grid  
Transmission and Distribution Equipment, State Grid Hunan Electric Company  
Limited Disaster Prevention and Reduction Center, Changsha, Hunan, P.R. China.

\* To whom correspondence should be addressed.

Tel.: +86-0731-86332056.

E-mail: 17364041396@163.com (D. Ying).

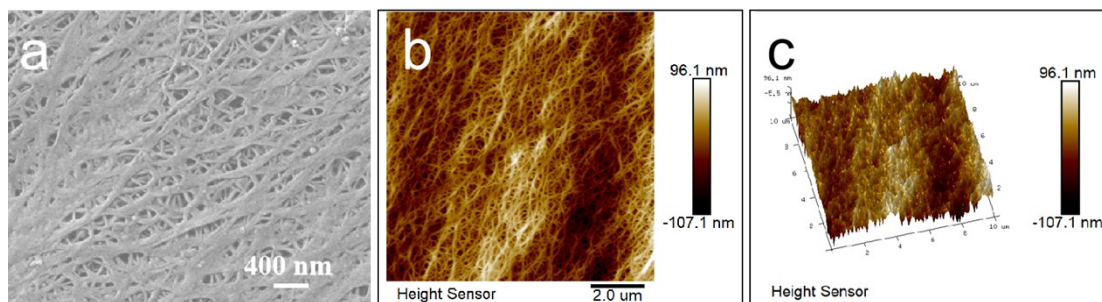

**Figure S1** SEM image (a), AFM topographic image (b) and height image (c) of the bare PE separator.

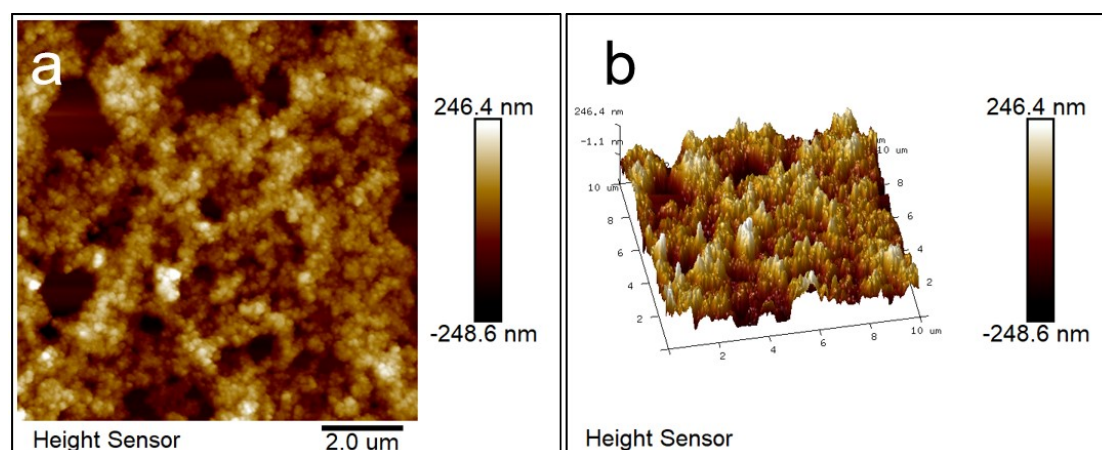

**Figure S2** (a) Atomic force microscopy (AFM) topographic image and (b) height image of aramid fibers.

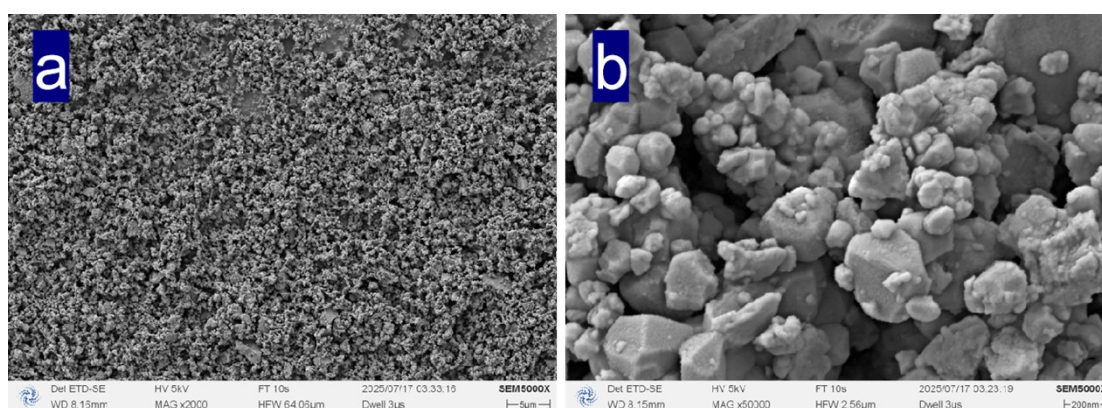

**Figure S3** (a) 2000x, (b) 50000x magnification SEM image of  $\text{ZrO}_2$  particles

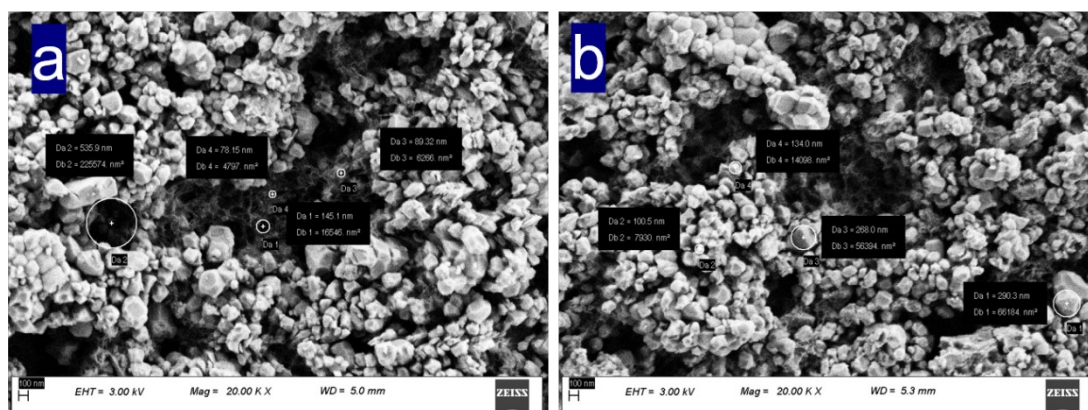

**Figure S4** 20,000x magnification SEM image of the PE@AF-ZrO<sub>2</sub>, (a) front side, (b) back side.

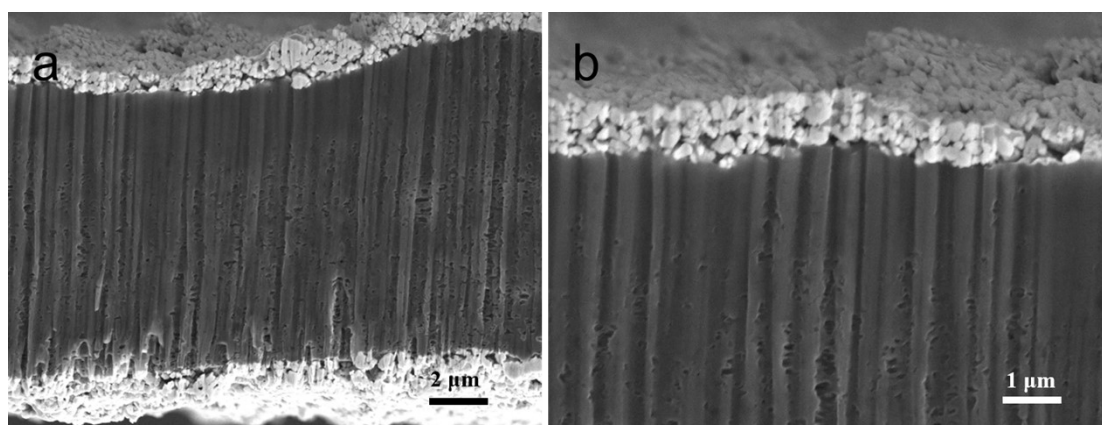

**Figure S5** FIB-SEM image of the PE@AF-ZrO<sub>2</sub> cross-section, (a) low-magnification, (b) high-magnification.

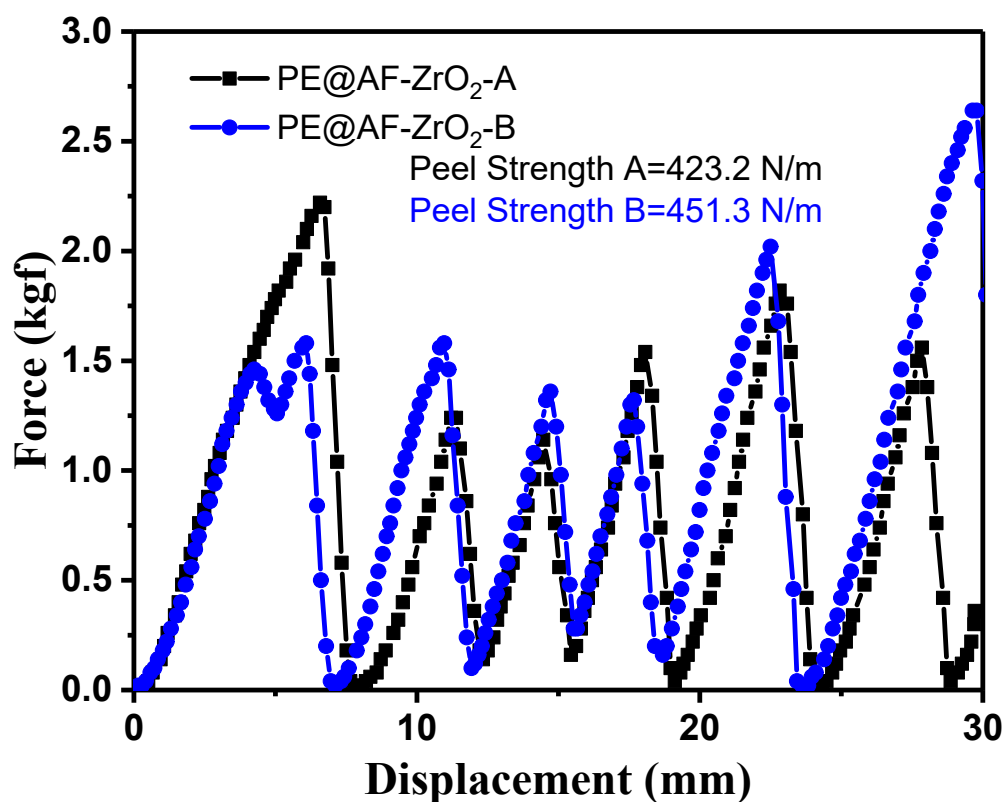

**Figure S6** Peel force-displacement curve of PE@AF-ZrO<sub>2</sub> separator sample.

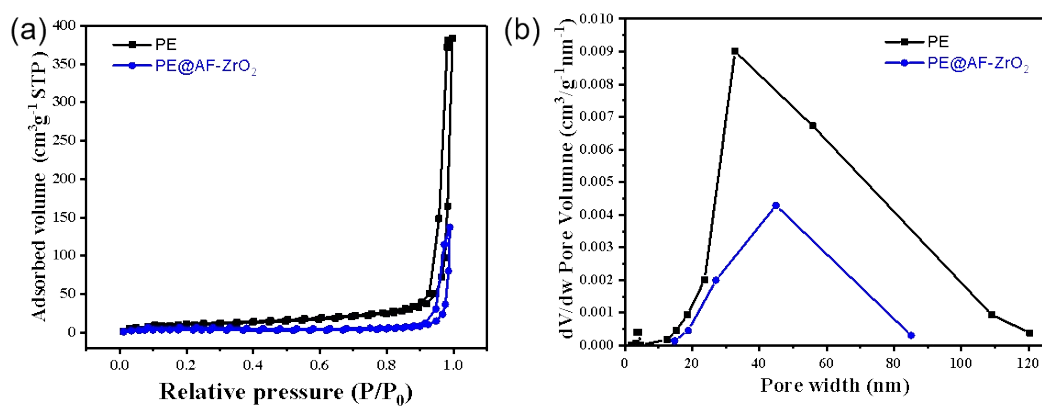

**Figure S7** (a) N<sub>2</sub> adsorption-desorption isotherms of pristine PE and PE@AF-ZrO<sub>2</sub> separators, (b) Corresponding BJH pore size distribution curves.

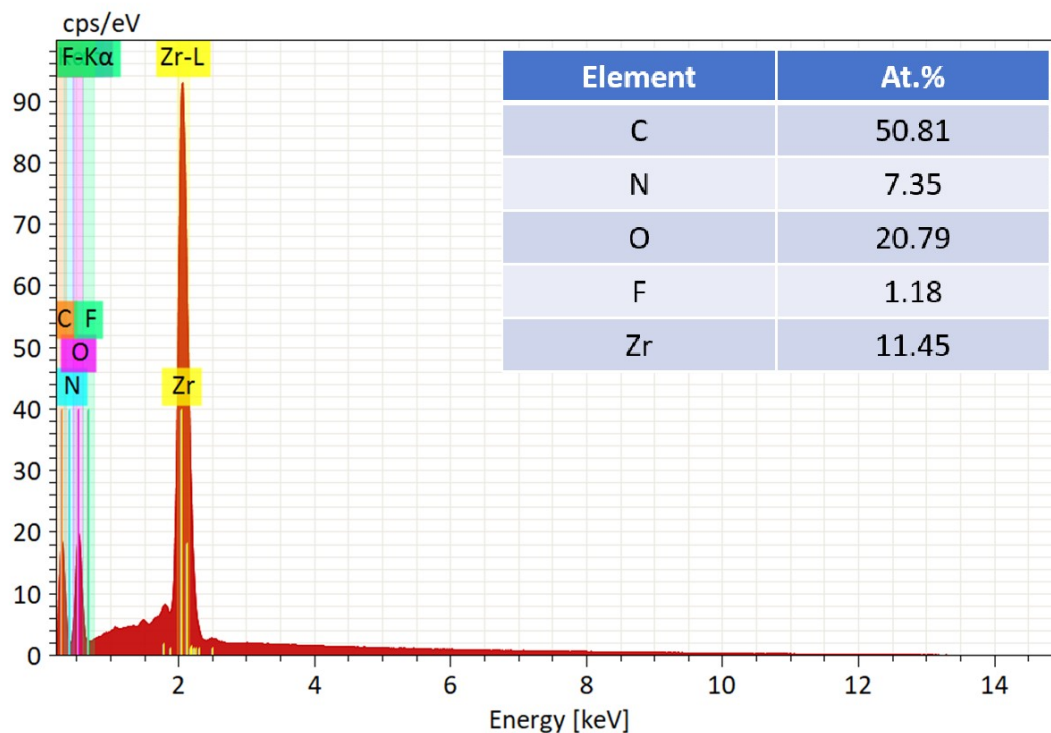

**Figure S8** Energy-dispersive spectroscopy of PE@AF-ZrO<sub>2</sub>.

**Contact Angle test video files for the bare PE separator and the PE@AF-ZrO<sub>2</sub> separator.**

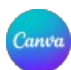

Bare PE.mp4

**Video S9a** Contact angle test video of the bare PE separator.

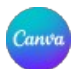

PE@AF-ZrO<sub>2</sub>.mp4

**Video S9b** Contact angle test video of the PE@AF-ZrO<sub>2</sub> separator.
